# Supplementary material for: Impact of assessing patient-reported outcomes with mobile apps on patient–provider interaction
Source: HighWire-hosted journal article supplement (doi:10.1136/rmdopen-2021-001566), 2021-04-01

## Supplementary Materials

**Supplementary Table 1. Covariates included in propensity score models\***

| Model covariates                                                          | Regression outcome     |                            |                                        |                                 |                           |
|---------------------------------------------------------------------------|------------------------|----------------------------|----------------------------------------|---------------------------------|---------------------------|
|                                                                           | Shared decision making | Physician disease tracking | Low disease activity at the last visit | Improvement in disease activity | Treatment intensification |
| Age                                                                       | •                      | •                          | •                                      | •                               |                           |
| Gender                                                                    | •                      | •                          | •                                      | •                               | •                         |
| Employment status                                                         |                        | •                          | •                                      |                                 |                           |
| Highest level of education                                                |                        |                            | •                                      |                                 |                           |
| Physician gender                                                          |                        |                            | •                                      |                                 |                           |
| Clinic type                                                               | •                      | •                          |                                        |                                 |                           |
| Diagnosis                                                                 | •                      | •                          | •                                      | •                               | •                         |
| Disease duration                                                          | •                      |                            | •                                      |                                 | •                         |
| Z-score of baseline disease activity <sup>&amp;</sup>                     |                        |                            | •                                      | •                               | •                         |
| Patient-reported health status                                            | •                      | •                          | •                                      |                                 | •                         |
| EQ-5D                                                                     |                        |                            |                                        | •                               |                           |
| Body mass index (BMI)                                                     |                        |                            | •                                      |                                 | •                         |
| Number of chronic conditions                                              |                        |                            | •                                      |                                 |                           |
| Smoking history                                                           | •                      | •                          |                                        |                                 |                           |
| Conventional synthetic disease-modifying antirheumatic drug (csDMARD) use | •                      | •                          |                                        |                                 | •                         |
| Biologic use                                                              |                        |                            | •                                      |                                 |                           |
| Corticosteroid use                                                        | •                      | •                          | •                                      | •                               | •                         |
| Confidence in using smartphones/internet                                  | •                      | •                          |                                        |                                 |                           |

\*These propensity score models modeled the probability of app exposure for individuals in each regression analysis. The propensity scores were used to calculate inverse probability of treatment weights for each regression analysis.

<sup>&</sup>Z-score of disease activity (DAS28/BASDAI/physician global disease activity for RA/axSpA/PsA patients) at 1 year prior to the last visit.

**Supplementary Table 2. Level of missingness among covariates included in propensity score models\***

| <b>Model covariates</b>                                                   | <b>Number missing</b> | <b>Percent missing</b> |
|---------------------------------------------------------------------------|-----------------------|------------------------|
| Age                                                                       | 0                     | 0                      |
| Gender                                                                    | 0                     | 0                      |
| Employment status                                                         | 691                   | 32.7                   |
| Highest level of education                                                | 201                   | 9.52                   |
| Physician gender                                                          | 2                     | 0.1                    |
| Clinic type                                                               | 2                     | 0.1                    |
| Diagnosis                                                                 | 0                     | 0                      |
| Disease duration                                                          | 31                    | 1.5                    |
| Z-score of baseline disease activity*                                     | 262                   | 12.4                   |
| Patient-reported health status                                            | 291                   | 13.8                   |
| EQ-5D                                                                     | 290                   | 13.7                   |
| Body mass index (BMI)                                                     | 707                   | 33.5                   |
| Number of chronic conditions                                              | 0                     | 0                      |
| Smoking history                                                           | 12                    | 0.6                    |
| Conventional synthetic disease-modifying antirheumatic drug (csDMARD) use | 0                     | 0                      |
| Biologic use                                                              | 0                     | 0                      |
| Corticosteroid use                                                        | 0                     | 0                      |
| Confidence in using smartphones/internet                                  | 0                     | 0                      |

\*These propensity score models modeled the probability of app exposure for individuals in each regression analysis. The propensity scores were used to calculate inverse probability of treatment weights for each regression analysis.

**Supplementary Table 3. Covariates used for multiple imputation of missing values in propensity score models\***

| Type of covariate | Covariates included                                                                                                                                                                                                                                                             |
|-------------------|---------------------------------------------------------------------------------------------------------------------------------------------------------------------------------------------------------------------------------------------------------------------------------|
| Continuous        | Age<br>Disease duration<br>Patient-reported health status<br>EQ-5D<br>BMI<br>Number of chronic conditions<br>Number of consultations in the last 12 months<br>Z-score of baseline disease activity*<br>Z-score of disease activity at the visit 1 year prior to the last visit* |
| Binary            | Gender<br>Employment status<br>Biologic use<br>DMARD use<br>Corticosteroid use<br>Low disease activity at baseline<br>Alcohol use<br>Physician gender<br>Confidence in using smartphones/internet<br>Regular use of health apps                                                 |
| Ordered factor    | Highest level of education                                                                                                                                                                                                                                                      |
| Unordered factor  | Diagnosis<br>Smoking history<br>Clinic type (hospital, clinic, or academic medical center)<br>Language (French, German, or Italian)                                                                                                                                             |

\*These propensity score models modeled the probability of app exposure for individuals in each regression analysis. The propensity scores were used to calculate inverse probability of treatment weights for each regression analysis.

**Supplementary Tables 4-8. Unweighted and weighted baseline characteristics of participants****Supplementary Table 4. Analysis of shared decision making: unweighted and weighted baseline characteristics of participants\***

|                                                     | <b>No app</b>                                | <b>App only</b> | <b>App + discussion</b> |
|-----------------------------------------------------|----------------------------------------------|-----------------|-------------------------|
|                                                     | <b><u>Unweighted mean or %</u></b>           |                 |                         |
| Age in years                                        | 50.9                                         | 46.6            | 47.5                    |
| % Male                                              | 43%                                          | 45%             | 44%                     |
| Highest level of education completed                |                                              |                 |                         |
| % compulsory                                        | 9%                                           | 6%              | 8%                      |
| % vocational                                        | 57%                                          | 55%             | 56%                     |
| % tertiary                                          | 34%                                          | 39%             | 36%                     |
| % Employed                                          | 74%                                          | 82%             | 76%                     |
| Diagnosis                                           |                                              |                 |                         |
| % RA                                                | 37%                                          | 37%             | 38%                     |
| % PsA                                               | 29%                                          | 21%             | 15%                     |
| % axSpA                                             | 35%                                          | 43%             | 47%                     |
| Disease duration in years                           | 8.7                                          | 10.2            | 9.5                     |
| # of comorbid conditions                            | 1.4                                          | 1.3             | 1                       |
| % biologic DMARD users                              | 63%                                          | 71%             | 72%                     |
| % non-biologic DMARD users                          | 46%                                          | 39%             | 38%                     |
| Low disease activity at baseline                    | 51%                                          | 58%             | 64%                     |
| Confident user of internet/smartphone in daily life | 88%                                          | 95%             | 97%                     |
| Regular use of health tracking apps                 | 30%                                          | 27%             | 37%                     |
|                                                     | <b><u>Weighted mean or %<sup>#</sup></u></b> |                 |                         |
| Age in years                                        |                                              | 49.2            | 47.5                    |
| % Male                                              | 43%                                          | 40%             | 44%                     |
| Highest level of education completed                |                                              |                 |                         |
| % compulsory                                        | 9%                                           | 5%              | 8%                      |
| % vocational                                        | 56%                                          | 61%             | 56%                     |
| % tertiary                                          | 35%                                          | 34%             | 36%                     |

|                                                     |     |     |     |
|-----------------------------------------------------|-----|-----|-----|
| % Employed                                          | 75% | 82% | 76% |
| Diagnosis                                           |     |     |     |
| % RA                                                | 43% | 42% | 40% |
| % PsA                                               | 21% | 21% | 19% |
| % axSpA                                             | 35% | 37% | 40% |
| Disease duration in years                           | 8.9 | 8.8 | 9.0 |
| # of comorbid conditions                            | 1.4 | 1.4 | 1.1 |
| % biologic DMARD users                              | 63% | 72% | 73% |
| % non-biologic DMARD users                          | 45% | 45% | 43% |
| Low disease activity at baseline                    | 52% | 53% | 57% |
| Confident user of internet/smartphone in daily life | 89% | 97% | 94% |
| Regular use of health tracking apps                 | 30% | 29% | 36% |

\*Based on multiply imputed data.

#Weights based on the multinomial propensity score model for the analysis of shared decision making.

**Supplementary Table 5. Analysis of physician disease tracking: unweighted and weighted baseline characteristics of participants\***

|                                                     | No app                                       | App only | App + discussion |
|-----------------------------------------------------|----------------------------------------------|----------|------------------|
|                                                     | <b><u>Unweighted mean or %</u></b>           |          |                  |
| Age in years                                        | 50.9                                         | 46.6     | 47.5             |
| % Male                                              | 43%                                          | 45%      | 44%              |
| Highest level of education completed                |                                              |          |                  |
| % compulsory                                        | 9%                                           | 6%       | 8%               |
| % vocational                                        | 57%                                          | 55%      | 56%              |
| % tertiary                                          | 34%                                          | 39%      | 36%              |
| % Employed                                          | 74%                                          | 82%      | 76%              |
| Diagnosis                                           |                                              |          |                  |
| % RA                                                | 44%                                          | 37%      | 38%              |
| % PsA                                               | 22%                                          | 21%      | 15%              |
| % axSpA                                             | 35%                                          | 43%      | 47%              |
| Disease duration in years                           | 8.7                                          | 10.2     | 9.5              |
| # of comorbid conditions                            | 1.4                                          | 1.3      | 1                |
| % biologic DMARD users                              | 63%                                          | 71%      | 72%              |
| % non-biologic DMARD users                          | 46%                                          | 39%      | 38%              |
| Low disease activity at baseline                    | 51%                                          | 58%      | 64%              |
| Confident user of internet/smartphone in daily life | 88%                                          | 95%      | 97%              |
| Regular use of health tracking apps                 | 30%                                          | 27%      | 37%              |
|                                                     | <b><u>Weighted mean or %<sup>#</sup></u></b> |          |                  |
| Age in years                                        | 50.9                                         | 46.6     | 47.5             |
| % Male                                              | 43%                                          | 45%      | 44%              |
| Highest level of education completed                |                                              |          |                  |
| % compulsory                                        | 9%                                           | 6%       | 8%               |
| % vocational                                        | 57%                                          | 55%      | 56%              |
| % tertiary                                          | 34%                                          | 39%      | 36%              |

|                                                     |     |      |     |
|-----------------------------------------------------|-----|------|-----|
| % Employed                                          | 75% | 81%  | 75% |
| Diagnosis                                           |     |      |     |
| % RA                                                | 43% | 42%  | 42% |
| % PsA                                               | 21% | 21%  | 19% |
| % axSpA                                             | 36% | 37%  | 38% |
| Disease duration in years                           | 8.7 | 10.6 | 9.7 |
| # of comorbid conditions                            | 1.3 | 1.5  | 1.3 |
| % biologic DMARD users                              | 63% | 74%  | 76% |
| % non-biologic DMARD users                          | 45% | 45%  | 44% |
| Low disease activity at baseline                    | 52% | 55%  | 56% |
| Confident user of internet/smartphone in daily life | 89% | 96%  | 91% |
| Regular use of health tracking apps                 | 30% | 31%  | 34% |

\*Based on multiply imputed data.

#Weights based on the multinomial propensity score model for the analysis of physician disease tracking.

**Supplementary Table 6. Analysis of low disease activity at the last visit: unweighted and weighted baseline characteristics of participants\***

|                                                     | No app                                       | App only | App + discussion |
|-----------------------------------------------------|----------------------------------------------|----------|------------------|
|                                                     | <b><u>Unweighted mean or %</u></b>           |          |                  |
| Age in years                                        | 51.4                                         | 47.8     | 48.3             |
| % Male                                              | 44%                                          | 42%      | 46%              |
| Highest level of education completed                |                                              |          |                  |
| % compulsory                                        | 10%                                          | 5%       | 8%               |
| % vocational                                        | 56%                                          | 54%      | 58%              |
| % tertiary                                          | 34%                                          | 41%      | 34%              |
| % Employed                                          | 74%                                          | 79%      | 75%              |
| Diagnosis                                           |                                              |          |                  |
| % RA                                                | 39%                                          | 35%      | 38%              |
| % PsA                                               | 26%                                          | 21%      | 17%              |
| % axSpA                                             | 35%                                          | 44%      | 45%              |
| Disease duration in years                           | 9.4                                          | 11.2     | 9.8              |
| # of comorbid conditions                            | 1.6                                          | 1.2      | 1.0              |
| % biologic DMARD users                              | 68%                                          | 77%      | 76%              |
| % non-biologic DMARD users                          | 47%                                          | 40%      | 37%              |
| Low disease activity at baseline                    | 47%                                          | 59%      | 63%              |
| Confident user of internet/smartphone in daily life | 87%                                          | 95%      | 97%              |
| Regular use of health tracking apps                 | 29%                                          | 31%      | 37%              |
|                                                     | <b><u>Weighted mean or %<sup>#</sup></u></b> |          |                  |
| Age in years                                        | 51.4                                         | 47.8     | 48.3             |
| % Male                                              | 44%                                          | 42%      | 46%              |
| Highest level of education completed                |                                              |          |                  |
| % compulsory                                        | 10%                                          | 5%       | 8%               |
| % vocational                                        | 56%                                          | 54%      | 58%              |
| % tertiary                                          | 34%                                          | 41%      | 34%              |



|                                                     |     |      |     |
|-----------------------------------------------------|-----|------|-----|
| % Employed                                          | 74% | 78%  | 76% |
| Diagnosis                                           |     |      |     |
| % RA                                                | 38% | 38%  | 36% |
| % PsA                                               | 25% | 23%  | 21% |
| % axSpA                                             | 36% | 39%  | 43% |
| Disease duration in years                           | 9.5 | 10.0 | 9.8 |
| # of comorbid conditions                            | 1.5 | 1.2  | 1.2 |
| % biologic DMARD users                              | 69% | 77%  | 76% |
| % non-biologic DMARD users                          | 45% | 44%  | 41% |
| Low disease activity at baseline                    | 48% | 54%  | 56% |
| Confident user of internet/smartphone in daily life | 88% | 95%  | 97% |
| Regular use of health tracking apps                 | 29% | 29%  | 37% |

\*Based on multiply imputed data.

#Weights based on the multinomial propensity score model for the analysis of low disease activity at the last visit.

**Supplementary Table 7. Analysis of improvement in disease activity: unweighted and weighted baseline characteristics of participants\***

|                                                     | No app                                       | App only | App + discussion |
|-----------------------------------------------------|----------------------------------------------|----------|------------------|
|                                                     | <b><u>Unweighted mean or %</u></b>           |          |                  |
| Age in years                                        | 51.6                                         | 47.4     | 48.1             |
| % Male                                              | 45%                                          | 39%      | 47%              |
| Highest level of education completed                |                                              |          |                  |
| % compulsory                                        | 10%                                          | 5%       | 7%               |
| % vocational                                        | 55%                                          | 54%      | 57%              |
| % tertiary                                          | 35%                                          | 41%      | 36%              |
| % Employed                                          | 74%                                          | 79%      | 75%              |
| Diagnosis                                           |                                              |          |                  |
| % RA                                                | 37%                                          | 34%      | 36%              |
| % PsA                                               | 29%                                          | 22%      | 19%              |
| % axSpA                                             | 35%                                          | 43%      | 45%              |
| Disease duration in years                           | 9.3                                          | 11.5     | 9.9              |
| # of comorbid conditions                            | 1.5                                          | 1.2      | 1.0              |
| % biologic DMARD users                              | 68%                                          | 79%      | 74%              |
| % non-biologic DMARD users                          | 47%                                          | 40%      | 37%              |
| Low disease activity at baseline                    | 46%                                          | 59%      | 63%              |
| Confident user of internet/smartphone in daily life | 88%                                          | 95%      | 98%              |
| Regular use of health tracking apps                 | 29%                                          | 31%      | 36%              |
|                                                     | <b><u>Weighted mean or %<sup>#</sup></u></b> |          |                  |
| Age in years                                        | 51.6                                         | 47.4     | 48.1             |
| % Male                                              | 45%                                          | 39%      | 47%              |
| Highest level of education completed                |                                              |          |                  |
| % compulsory                                        | 10%                                          | 5%       | 7%               |
| % vocational                                        | 55%                                          | 54%      | 57%              |
| % tertiary                                          | 35%                                          | 41%      | 36%              |
| % Employed                                          | 74%                                          | 77%      | 73%              |

|                                                     |     |      |      |
|-----------------------------------------------------|-----|------|------|
| Diagnosis                                           |     |      |      |
| % RA                                                | 36% | 38%  | 34%  |
| % PsA                                               | 28% | 24%  | 24%  |
| % axSpA                                             | 36% | 39%  | 42%  |
| Disease duration in years                           | 9.3 | 12.0 | 10.4 |
| # of comorbid conditions                            | 1.5 | 1.5  | 1.1  |
| % biologic DMARD users                              | 68% | 79%  | 75%  |
| % non-biologic DMARD users                          | 46% | 44%  | 39%  |
| Low disease activity at baseline                    | 48% | 54%  | 58%  |
| Confident user of internet/smartphone in daily life | 88% | 96%  | 97%  |
| Regular use of health tracking apps                 | 29% | 31%  | 35%  |

\*Based on multiply imputed data

#Weights based on the multinomial propensity score model for the analysis of improvement in disease activity.

**Supplementary Table 8. Analysis of treatment intensification: unweighted and weighted baseline characteristics of participants\***

|                                                     | No app                                | App only | App + discussion |
|-----------------------------------------------------|---------------------------------------|----------|------------------|
|                                                     | <b>Unweighted mean or %</b>           |          |                  |
| Age in years                                        | 51.9                                  | 47.6     | 48.3             |
| % Male                                              | 42%                                   | 42%      | 44%              |
| Highest level of education completed                |                                       |          |                  |
| % compulsory                                        | 10%                                   | 5%       | 8%               |
| % vocational                                        | 57%                                   | 54%      | 58%              |
| % tertiary                                          | 33%                                   | 41%      | 35%              |
| % Employed                                          | 72%                                   | 80%      | 75%              |
| Diagnosis                                           |                                       |          |                  |
| % RA                                                | 47%                                   | 37%      | 41%              |
| % PsA                                               | 22%                                   | 20%      | 16%              |
| % axSpA                                             | 31%                                   | 43%      | 43%              |
| Disease duration in years                           | 9.4                                   | 11.2     | 9.8              |
| # of comorbid conditions                            | 1.5                                   | 1.3      | 1.1              |
| % biologic DMARD users                              | 67%                                   | 77%      | 77%              |
| % non-biologic DMARD users                          | 50%                                   | 39%      | 41%              |
| Low disease activity at baseline                    | 50%                                   | 59%      | 64%              |
| Confident user of internet/smartphone in daily life | 86%                                   | 96%      | 97%              |
| Regular use of health tracking apps                 | 29%                                   | 31%      | 37%              |
|                                                     | <b>Weighted mean or %<sup>#</sup></b> |          |                  |
| Age in years                                        | 51.9                                  | 47.6     | 48.3             |
| % Male                                              | 42%                                   | 42%      | 44%              |
| Highest level of education completed                |                                       |          |                  |
| % compulsory                                        | 10%                                   | 5%       | 8%               |
| % vocational                                        | 57%                                   | 54%      | 58%              |
| % tertiary                                          | 33%                                   | 41%      | 35%              |
| % Employed                                          | 73%                                   | 79%      | 72%              |

|                                                     |     |      |      |
|-----------------------------------------------------|-----|------|------|
| Diagnosis                                           |     |      |      |
| % RA                                                | 46% | 42%  | 44%  |
| % PsA                                               | 21% | 22%  | 21%  |
| % axSpA                                             | 33% | 36%  | 35%  |
| Disease duration in years                           | 9.4 | 11.1 | 10.0 |
| # of comorbid conditions                            | 1.5 | 1.4  | 1.3  |
| % biologic DMARD users                              | 67% | 76%  | 80%  |
| % non-biologic DMARD users                          | 48% | 44%  | 46%  |
| Low disease activity at baseline                    | 52% | 52%  | 57%  |
| Confident user of internet/smartphone in daily life | 88% | 93%  | 92%  |
| Regular use of health tracking apps                 | 29% | 30%  | 34%  |

\*Based on multiply imputed data

#Weights based on the multinomial propensity score model for the analysis of treatment intensification.

**Supplementary Figure 1. Status plot of SCQM app use over time**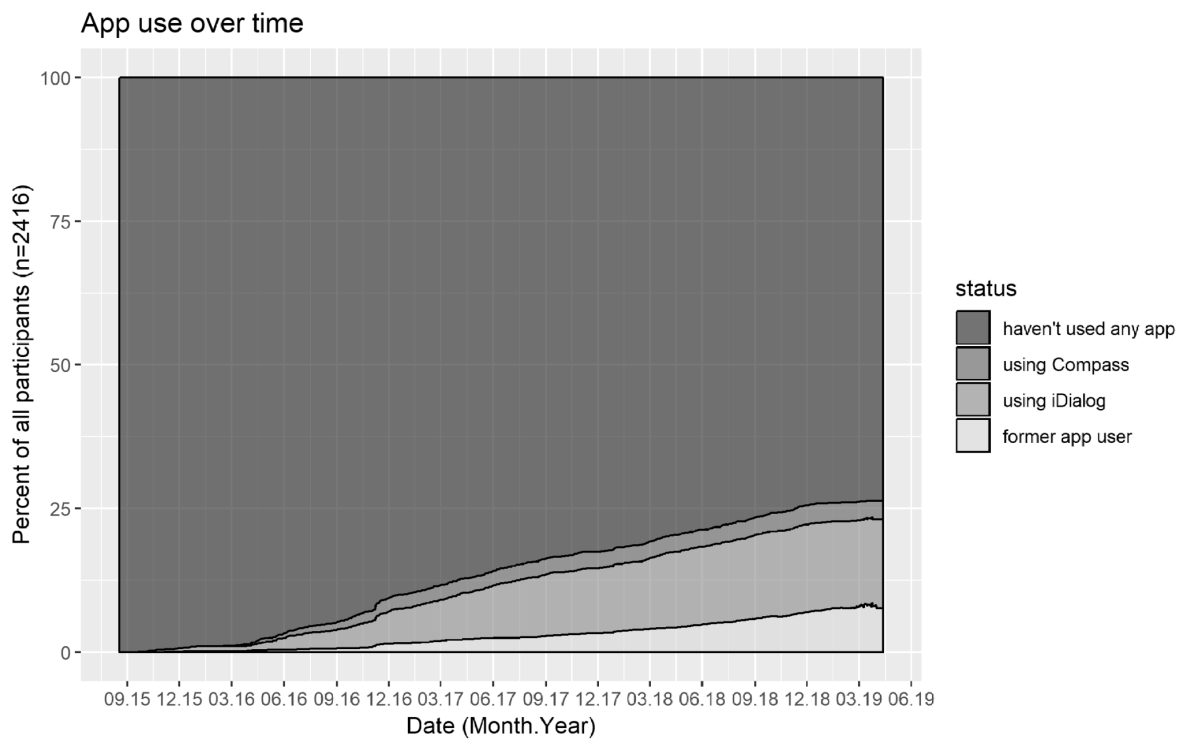

**Supplementary Figure 2.****Detection of moderate/high disease activity (MHDA) via SCQM visits and app entries among app users (n=637)**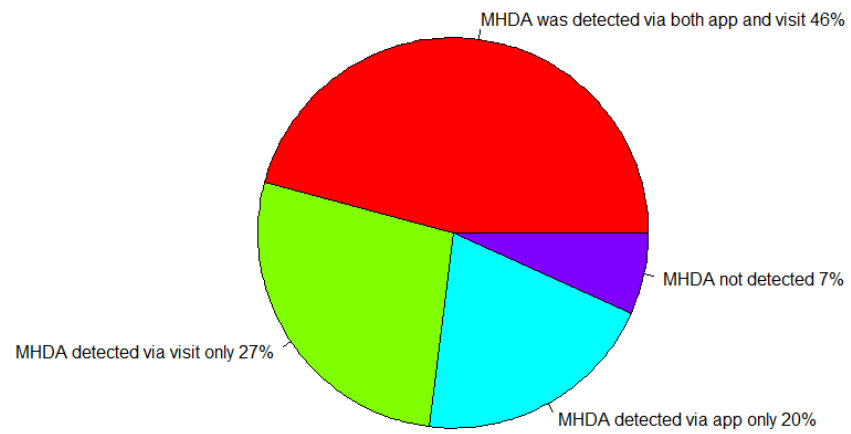

Supplement: rmdopen-2021-001566supp001_data_supplement.pdf [file rmdopen-2021-001566supp001_data_supplement.pdf]
